# Supplementary material
Source: HighWire-hosted journal article supplement (https://jnm.snmjournals.org/highwire/filestream/94673/field_highwire_adjunct_files/0/140780_Supplemental_Data.pdf)
Supplement: 140780_Supplemental_Data.pdf [file 140780_Supplemental_Data.pdf]

**SUPPLEMENTAL TABLE 1**

**Radiochemical Purity of Re-188-P2045 on Study Days 0-28**

| <b>Study Day</b> | <b>% ReO<sub>4</sub></b> | <b>% <sup>188</sup>ReO<sub>4</sub><br/>Non-mobile</b> | <b>% <sup>188</sup>Re-<br/>Glucosaminic acid</b> | <b>% <sup>188</sup>Re-<br/>P2045</b> |
|------------------|--------------------------|-------------------------------------------------------|--------------------------------------------------|--------------------------------------|
| 0                | 2.6                      | 0.6                                                   | 0.8                                              | 95.8 (92.5)                          |
| 3                | 1.0                      | 0.1                                                   | 1.5                                              | 97.4 (90.3)                          |
| 6                | 7.5                      | 0.9                                                   | 0.8                                              | 90.8 (95.9)                          |
| 9                | 3.7                      | 0.7                                                   | 1.1                                              | 98.2 (95.0)                          |
| 13               | 10.2                     | 2.8                                                   | 8.3                                              | 88.9 (89.0)                          |
| 16               | 5.2                      | 3.1                                                   | 1.2                                              | 95.7 (90.4)                          |
| 21               | 7.5                      | 0                                                     | 0.7                                              | 91.8 (92.0)                          |
| 28               | 2.8                      | 1.9                                                   | 1.8                                              | 96.3 (94.3)                          |

The % radiochemical purity of Re-188-P2045 and the % of contaminants in each dose are shown. Thin layer and high-pressure liquid chromatographic analysis of Re-188 The RCP was determined by integrating the HPLC chromatogram peaks. The results of HPLC analysis are shown parenthetically. The components of the Re-188 preparations for each dosing day determined by ITLC are shown in each column. The % radiochemical purity of Re-188-P2045 was determined by ITLC and also by HPLC shown in parenthesis. Images of the chromatograms were converted into 8-bit TIFF format with retention of pixel sizing information and count calibration factors (counts/pixel/second); allowing chromatogram peak quantitation

**SUPPLEMENTAL TABLE 2**  
**Tumor Volumes (mm<sup>3</sup>) in AR42J Xenografts**

| Treatment-groups                                       |               | Day after initial injection |        |       |        |        |        |
|--------------------------------------------------------|---------------|-----------------------------|--------|-------|--------|--------|--------|
|                                                        |               | 0                           | 3      | 6     | 9      | 13     | 16     |
| <b>Gp 1</b><br><b>Vehicle</b>                          | <b>Mean</b>   | 24                          | 59     | 119   | 155    | 318    | 528    |
|                                                        | <b>SD</b>     | 30                          | 47     | 111   | 151    | 248    | 301    |
|                                                        | <b>Fold Δ</b> | (1)                         | (2.5)  | (5.0) | (6.5)  | (13.3) | (22.0) |
| <b>Gp 2</b><br><b>P2045</b>                            | <b>Mean</b>   | 22                          | 55     | 69    | 83     | 216    | 529    |
|                                                        | <b>SD</b>     | 23                          | 45     | 42    | 83     | 226    | 301    |
|                                                        | <b>Fold Δ</b> | (1)                         | (2.5)  | (3.1) | (3.8)  | (9.8)  | (24.0) |
| <b>Gp3 Re-188</b><br><b>P2045, 1.85 mBq</b>            | <b>Mean</b>   | 20                          | 34     | 57    | 57     | 91     | 97     |
|                                                        | <b>SD</b>     | 28                          | 38     | 39    | 51     | 59     | 68     |
|                                                        | <b>Fold Δ</b> | (1)                         | (1.7)  | (2.9) | (2.9)  | (4.6)  | (4.9)  |
| <b>Gp4 Re-188-</b><br><b>P2045, 5.55 mBq</b>           | <b>Mean</b>   | 17                          | 32     | 37    | 39     | 44     | 41     |
|                                                        | <b>SD</b>     | 15                          | 20     | 19    | 19     | 31     | 28     |
|                                                        | <b>Fold Δ</b> | (1)                         | (1.9)  | (2.2) | (2.3)  | (2.6)  | (1.9)  |
| <b>Gp5 Re-188-</b><br><b>P2045, 11.1 mBq</b>           | <b>Mean</b>   | 21                          | 20     | 21    | 18     | 13     | 12     |
|                                                        | <b>SD</b>     | 30                          | 15     | 17    | 16     | 9      | 10     |
|                                                        | <b>Fold Δ</b> | (1)                         | (0.95) | (1.0) | (0.86) | (0.61) | (0.57) |
| <b>Gp 6 Y-90-</b><br><b>DOTATOC</b><br><b>22.2 mBq</b> | <b>Mean</b>   | 34                          | 42     | 38    | 49     | 84     | 91     |
|                                                        | <b>SD</b>     | 33                          | 42     | 27    | 26     | 35     | 44     |
|                                                        | <b>Fold Δ</b> | (1)                         | (1.2)  | (1.1) | (1.4)  | (2.5)  | (2.7)  |

The mean tumor volumes (mm<sup>3</sup>) their and standard deviation for each study-group are shown. The fold-change (fold Δ) in tumor volume compared to study day 0 are shown in parenthesis.

**SUPPLEMENTAL TABLE 3**

**Hematology and Clinical Chemistry of Blood and Serum Samples Collected  
from AR42J Rat Pancreatic Tumor-xenograft Nude Mice (Groups 1-5)**

| <b>Parameter</b>                            |      | <b>Controls</b> |              | <b>Re-188-P2045</b>          |                               |                               |
|---------------------------------------------|------|-----------------|--------------|------------------------------|-------------------------------|-------------------------------|
|                                             |      | <b>Eluate</b>   | <b>P2045</b> | <b>50 <math>\mu</math>Ci</b> | <b>150 <math>\mu</math>Ci</b> | <b>300 <math>\mu</math>Ci</b> |
| WBC/mm <sup>3</sup>                         | Mean | 10437           | 8043         | 8855                         | 9288                          | 8042                          |
|                                             | SD   | 10298           | 6972         | 2823                         | 3020                          | 4925                          |
| RBC x10 <sup>3</sup> /mm <sup>3</sup>       | Mean | 6.83            | 6.48         | 7.48                         | 7.65                          | 7.68                          |
|                                             | SD   | 1.0             | 1.4          | 0.52                         | 0.63                          | 0.62                          |
| Hgb, g/dL                                   | Mean | 12.5            | 12.1         | 13.1                         | 13.8                          | 13.4                          |
|                                             | SD   | 0.95            | 1.5          | 1.1                          | 0.58                          | 1.4                           |
| % PCV                                       | Mean | 36.1            | 35.0         | 39.2                         | 39.8                          | 39.5                          |
|                                             | SD   | 2.5             | 3.6          | 3.0                          | 2.8                           | 4.0                           |
| % MCV                                       | Mean | 49.9            | 65*          | 47.9                         | 49.7                          | 52.6                          |
|                                             | SD   | 1.5             | 24           | 1.2                          | 2.2                           | 4.9                           |
| % Neutrophils                               | Mean | 21              | 30           | 59.3**                       | 46.3**                        | 62**                          |
|                                             | SD   | 15.5            | 5.7          | 14.3                         | 17.2                          | 10.7                          |
| Platelets x10 <sup>3</sup> /mm <sup>3</sup> | Mean | 978             | 1135.2       | 1157.8                       | 1063                          | 825                           |
|                                             | SD   | 178             | 182          | 530                          | 270                           | 134                           |
| BUN<br>Mg/dL                                | Mean | 29.7            | 27.0         | 29.9                         | 29.8                          | 30.3                          |
|                                             | SD   | 3.6             | 3.4          | 5.3                          | 6.9                           | 6.3                           |
| Creatinine Mg/dL                            |      | < 0.3           | < 0.3        | < 0.3                        | < 0.3                         | < 0.3                         |

WBC = white blood cell

RBC = red blood cell

Hgb = hemoglobin

dL = deciliter or 100 cubic centimeters

PVC = packed cell volume

MCV = mean corpuscular volume

BUN = blood urea nitrogen

Significantly different from generator eluate control, \*p < 0.05, \*\*p < 0.01
